# Supplementary material for: Effectiveness and safety of treatments used for the management of patent ductus arteriosus (PDA) in preterm infants: a protocol for a systematic review and network meta-analysis
Source: PubMed Central journal article supplement — BMJ Open. 2016 Jul 25;6(7):e011271. doi: 10.1136/bmjopen-2016-011271 (PMC4964163; doi:10.1136/bmjopen-2016-011271), 2016-07-25
Supplement: bmjopen-2016-011271supp_appendix.pdf [file bmjopen-2016-011271supp_appendix.pdf]

## Appendix A. Medline Search Strategy

### Ovid MEDLINE(R) In-Process & Other Non-Indexed Citations, Ovid MEDLINE(R) Daily and Ovid MEDLINE(R) From 1946 to Present

1. Infant, Premature/
2. Premature Birth/
3. Infant, Newborn/
4. Infant, Premature, Diseases/
5. preterm.mp.
6. low birth weight.mp.
7. Infant, Low Birth Weight/
8. very low birth weight.mp.
9. Infant, Extremely Low Birth Weight/
10. lbw.mp.
11. vlbw.mp.
12. or/1-11
13. Ductus Arteriosus, Patent/
14. patent ductus arteriosus.mp.
15. ductus arteriosus.mp.
16. Ductus Arteriosus/
17. ductus.mp.
18. PDA.mp.
19. persistent ductus arteriosus.mp.
20. or/13-19
21. indomethacin.mp.
22. Indomethacin/
23. indometacin.mp.
24. indocid.mp.
25. ibuprofen.mp.
26. Ibuprofen/
27. brufen.mp.
28. paracetamol.mp.
29. Acetaminophen/
30. tylenol.mp.
31. acetaminophen.mp.
32. Anti-Inflammatory Agents, Non-Steroidal/
33. Cyclooxygenase Inhibitors/
34. prostaglandin synthetase inhibitor.mp.
35. NSAID?.mp.
36. or/21-35
37. 12 and 20 and 36
38. randomized controlled trial.pt.
39. randomized.mp.
40. placebo.mp.
41. or/38-40
42. 37 and 41
